# Supplementary material for: Antiproliferative and Apoptosis-Inducing Activities of 4-Isopropyl-2,6-bis(1-phenylethyl)phenol Isolated from Butanol Fraction of Cordyceps bassiana
Source: PubMed Central journal article supplement (PMC4397031; doi:10.1155/2015/739874), 2015-04-02

# Supplementary Fig. 1

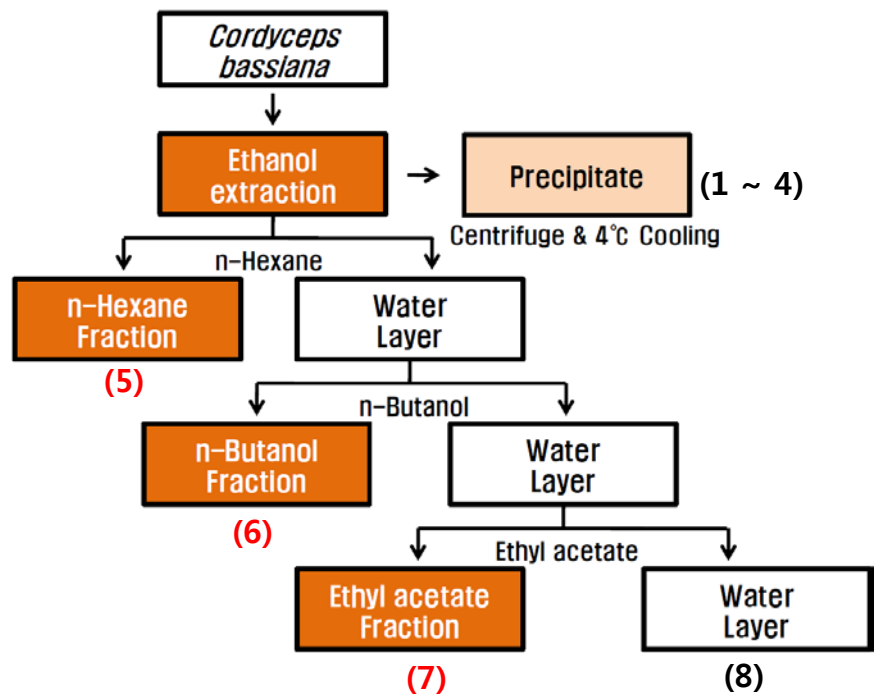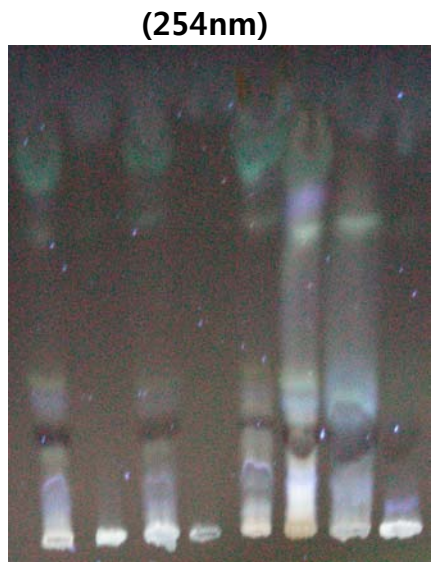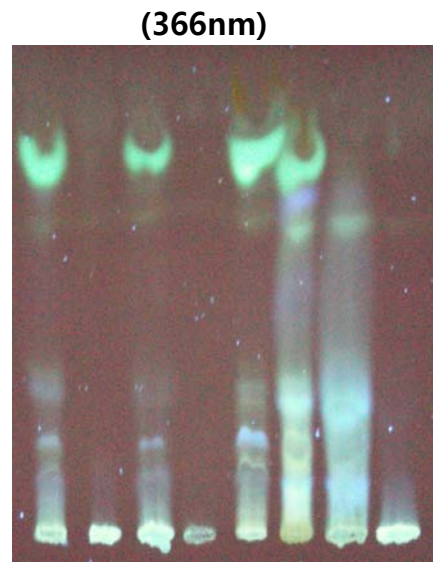

1 2 3 4 5 6 7 8      1 2 3 4 5 6 7 8  
 1 ~ 4: EtOH    5: Hexane    6: BuOH    7: EA    8: H<sub>2</sub>O

Supplementary Fig. 2

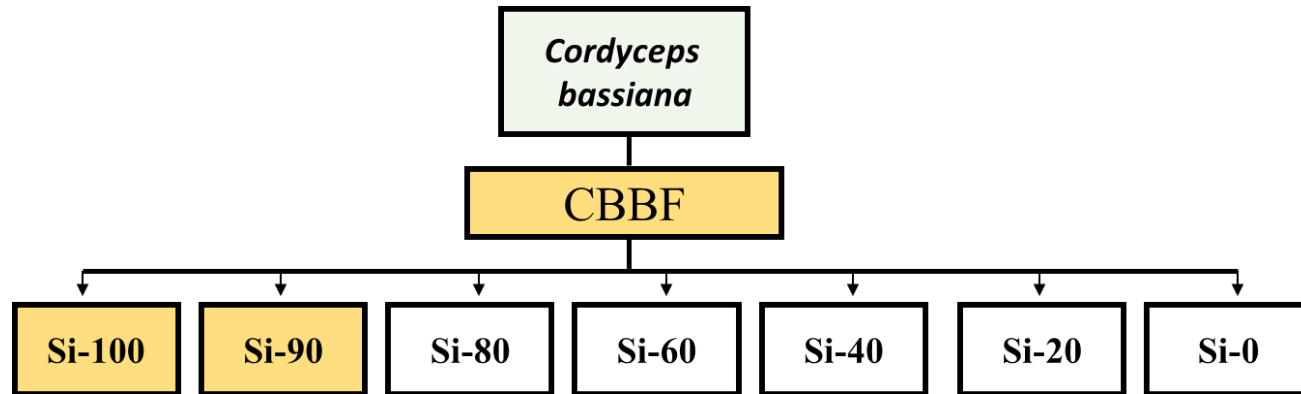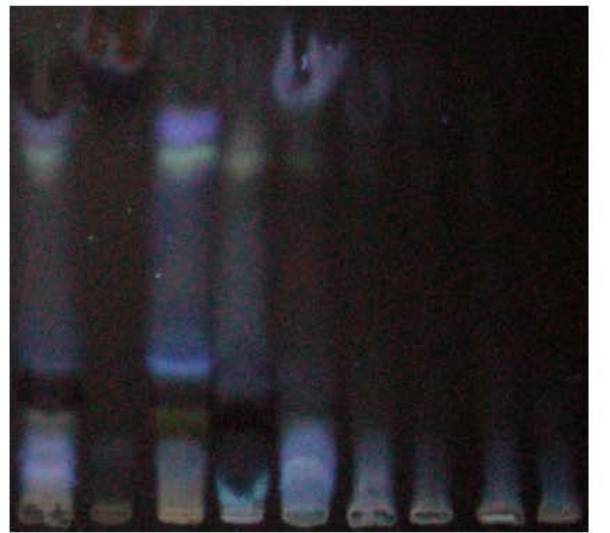

BF 100 90 80 60 40 20 0 H<sub>2</sub>O  
254nm

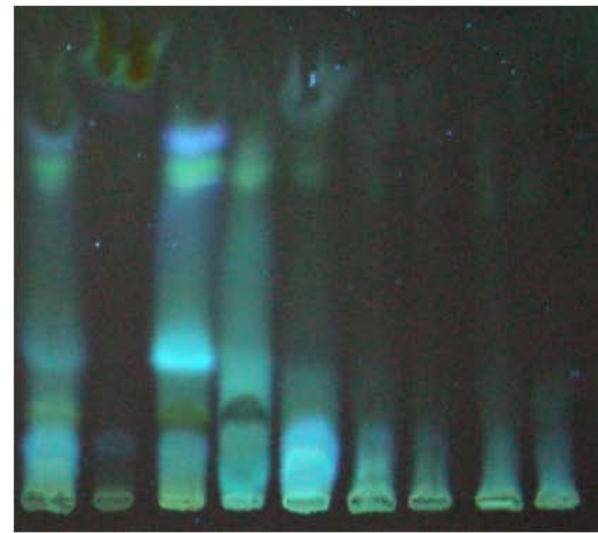

BF 100 90 80 60 40 20 0 H<sub>2</sub>O  
366nm

Supplementary Fig. 3

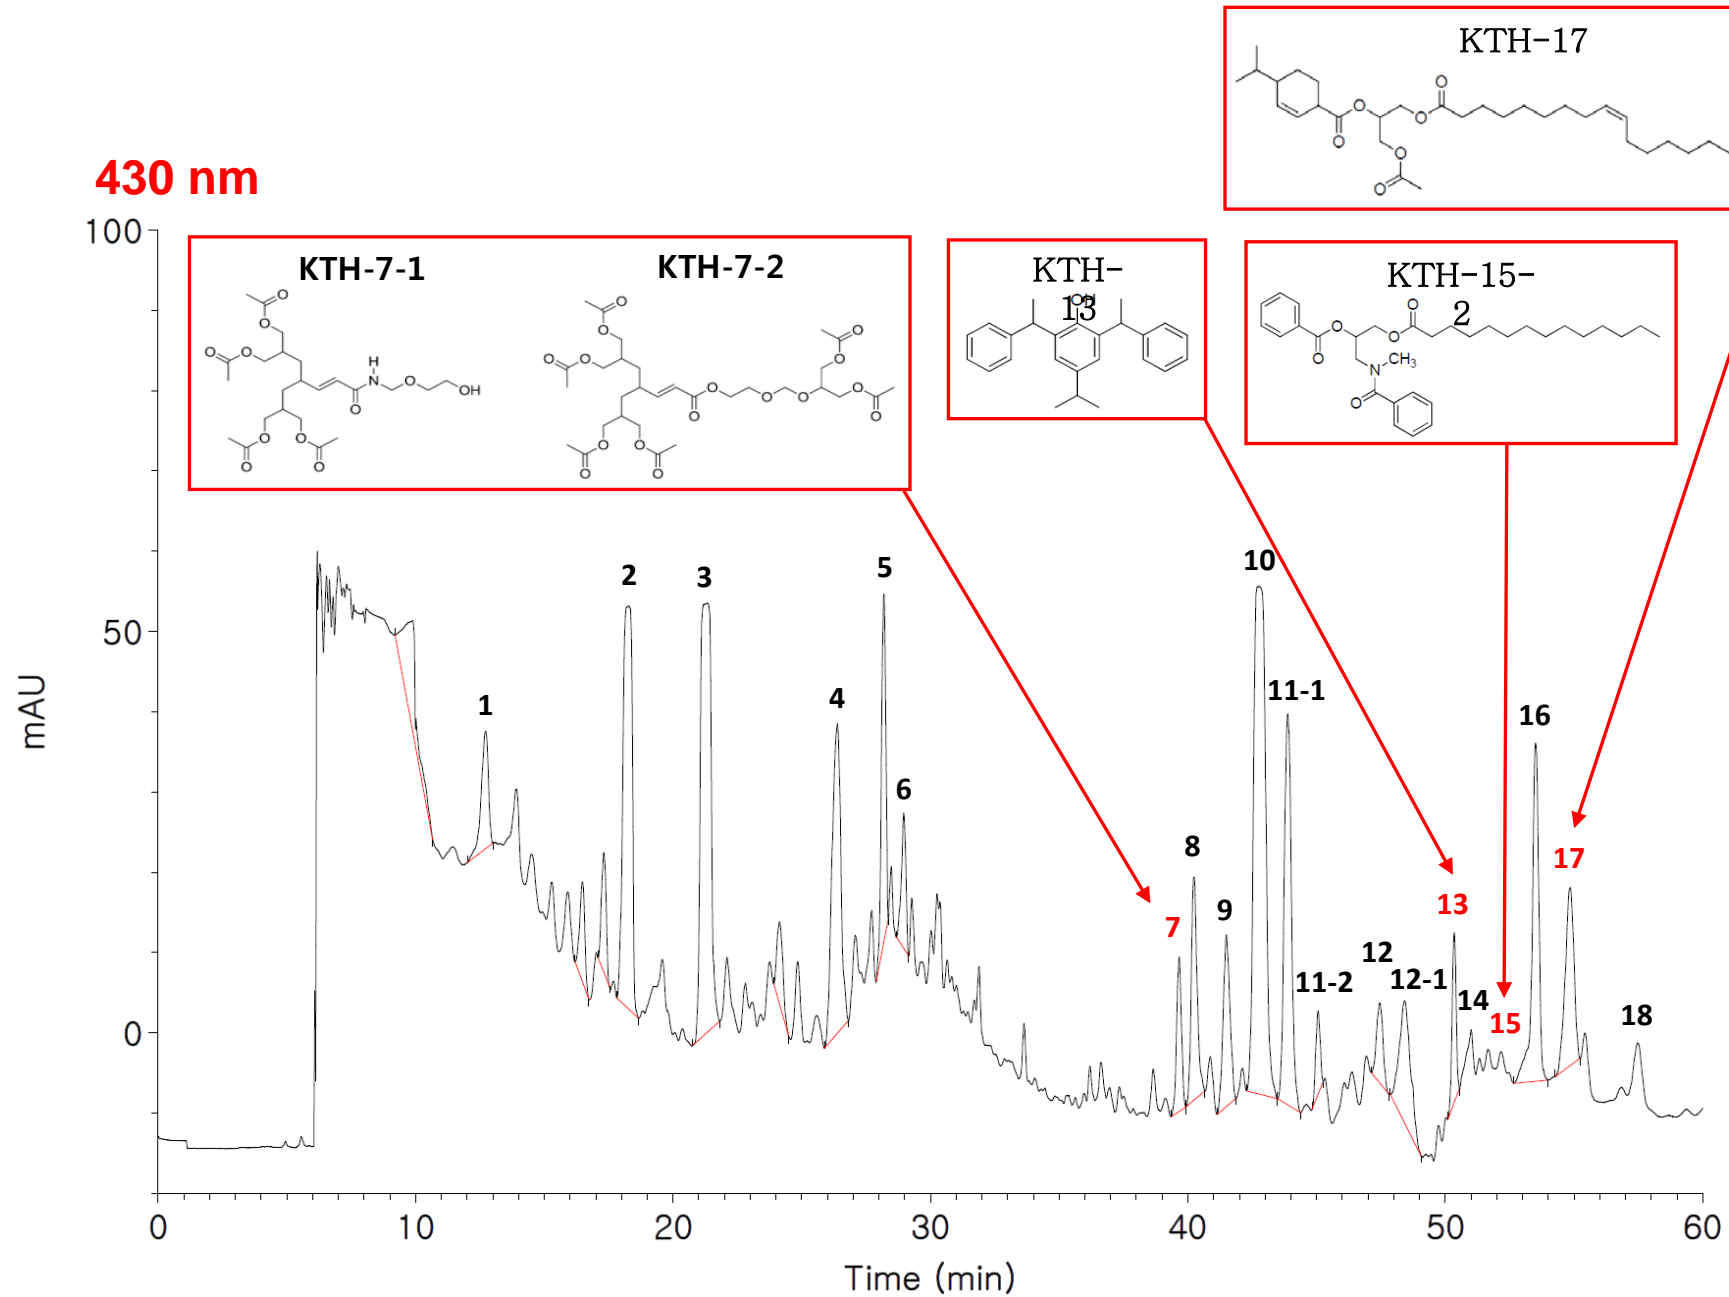

# Supplementary Fig. 4

(A)

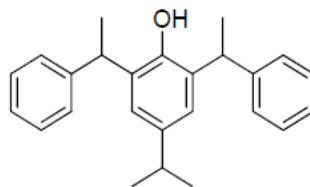

**KTH-13 (M.W. = 344)**

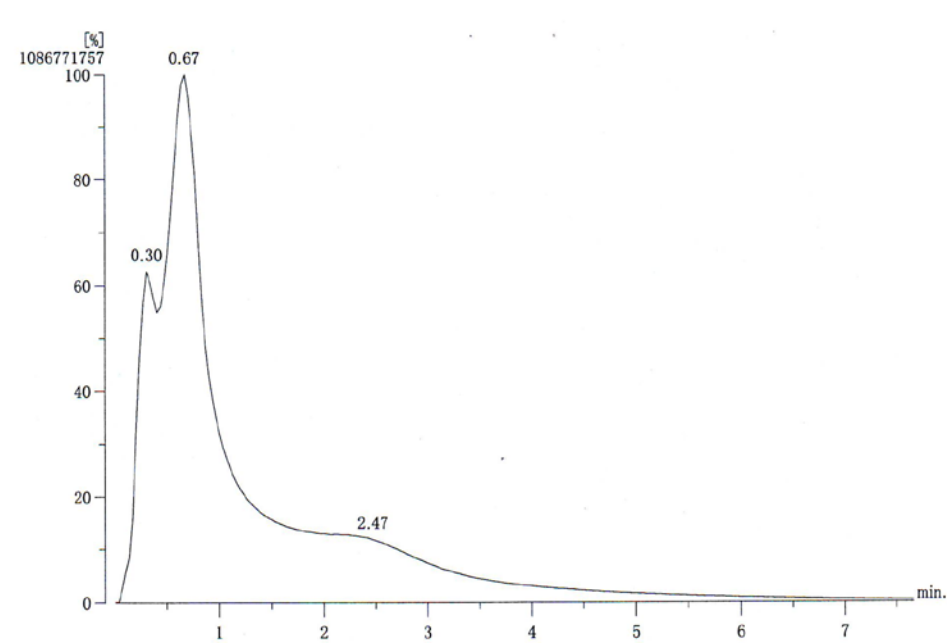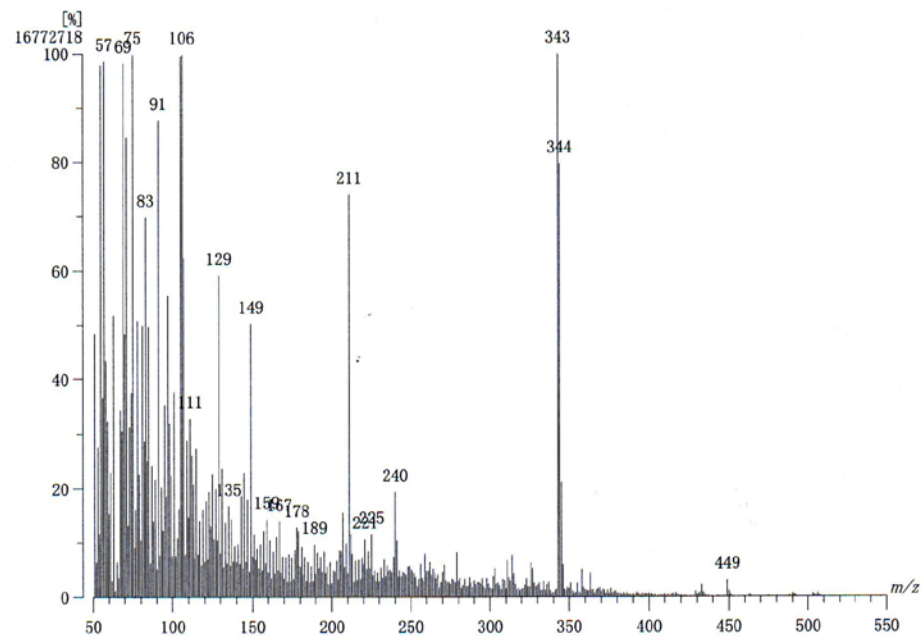

(B)

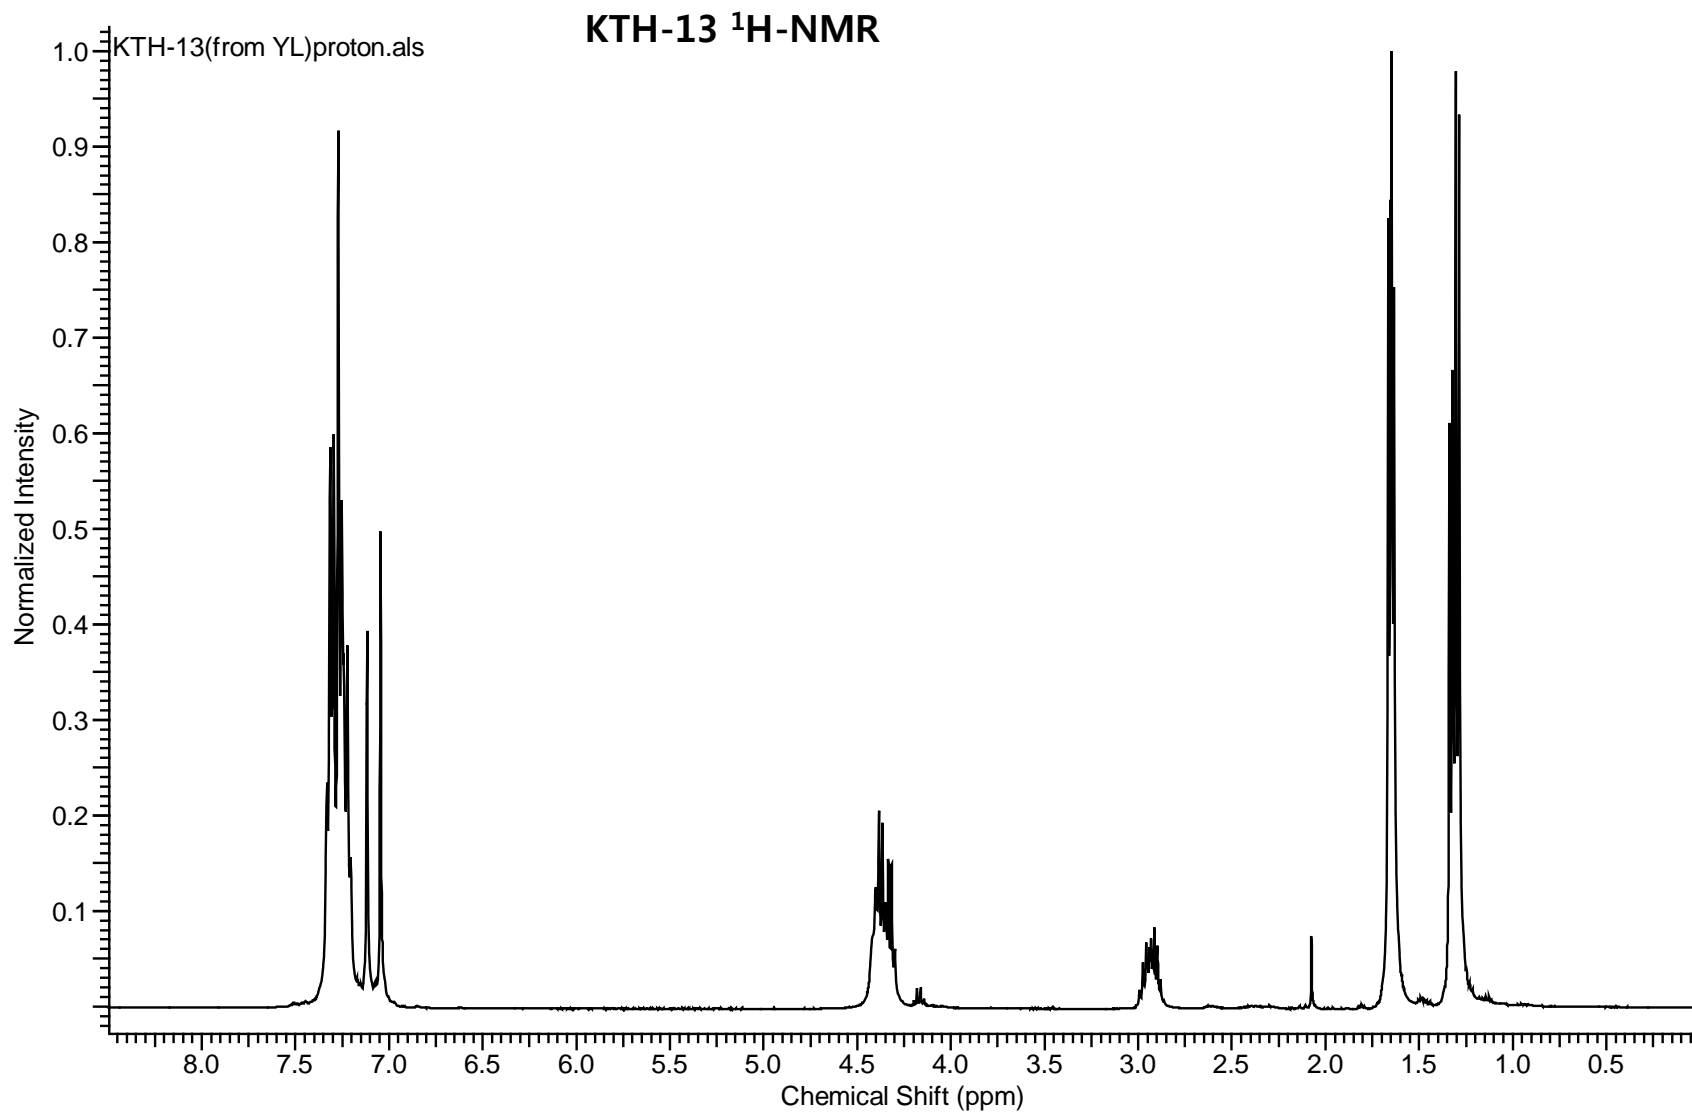

# Supplementary Fig. 5

**KTH-7-1**  
**(M.W. = 502)**

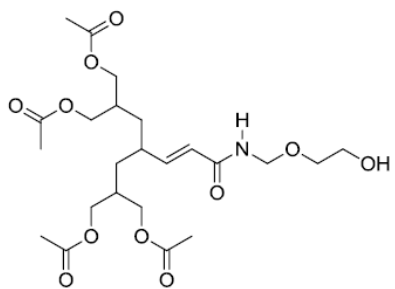

Item name: KTH7-1  
Description:

Channel name: Centroided : Combined : Average Time 1.6291 minutes : 1: TOF MS<sup>f</sup> (100-1500) 6eV ESI- - Low CE

5.14e5

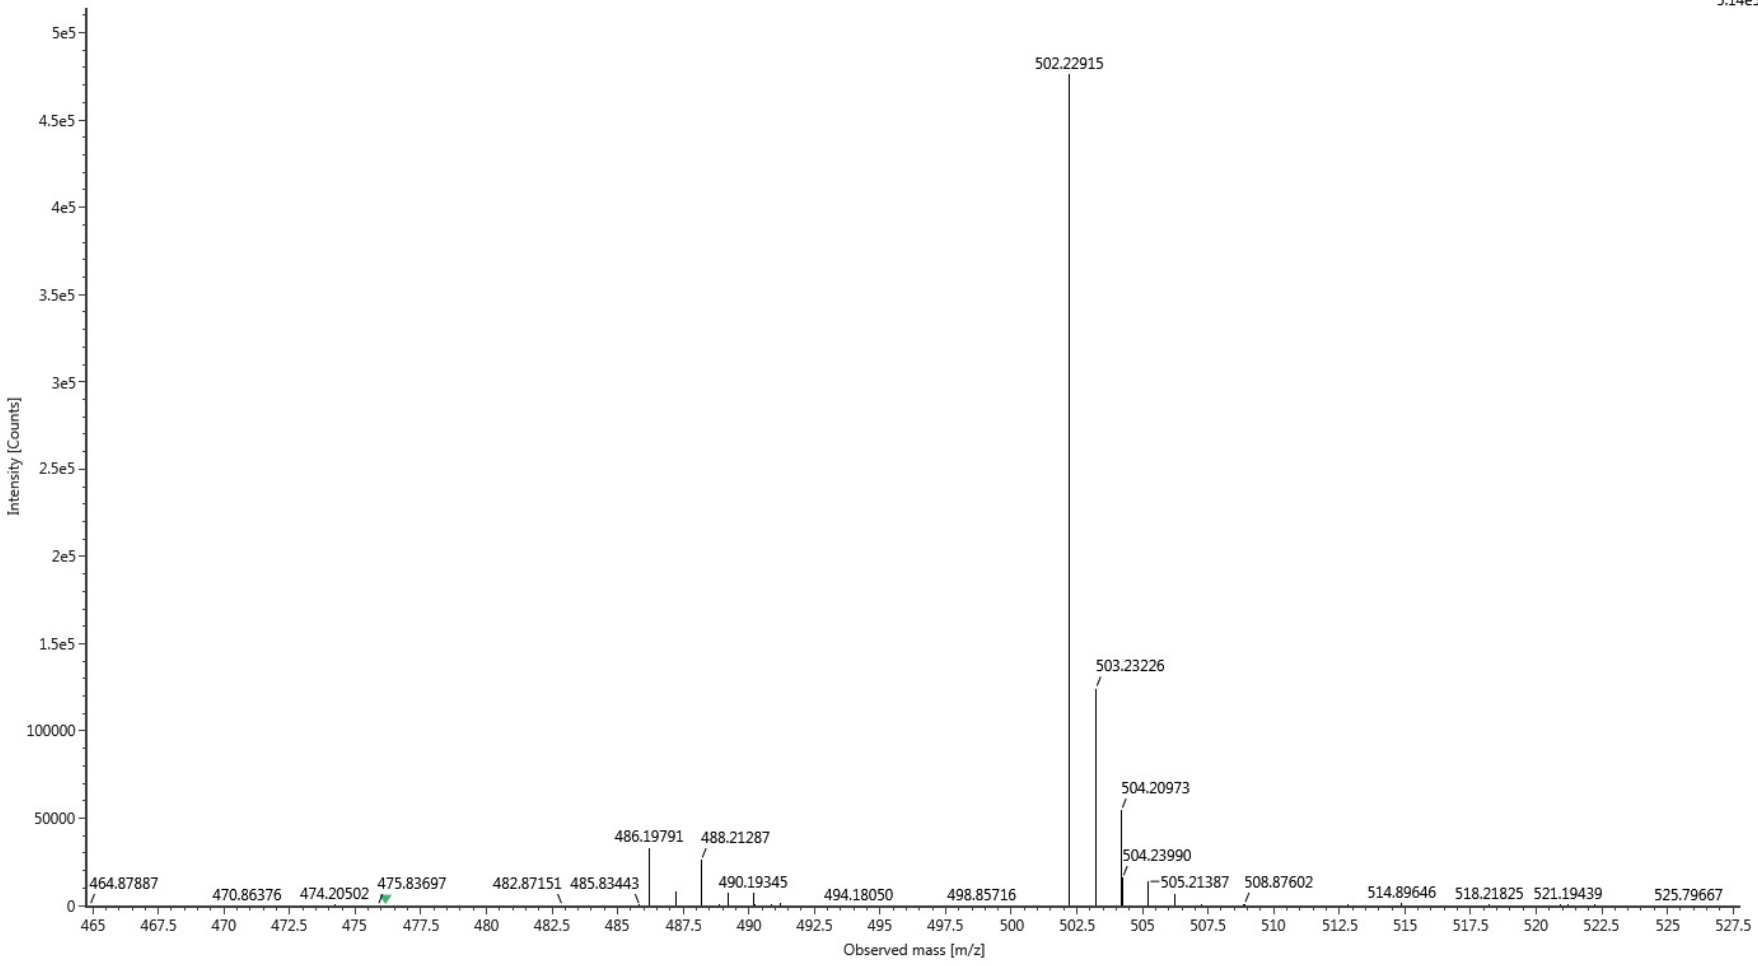

# Supplementary Fig. 6

**KTH-7-2**  
(M.W. = 663)

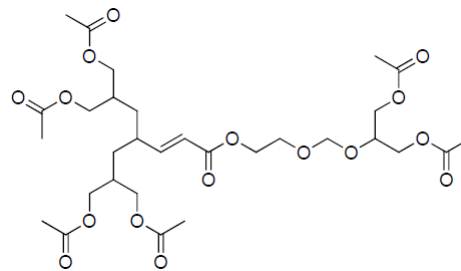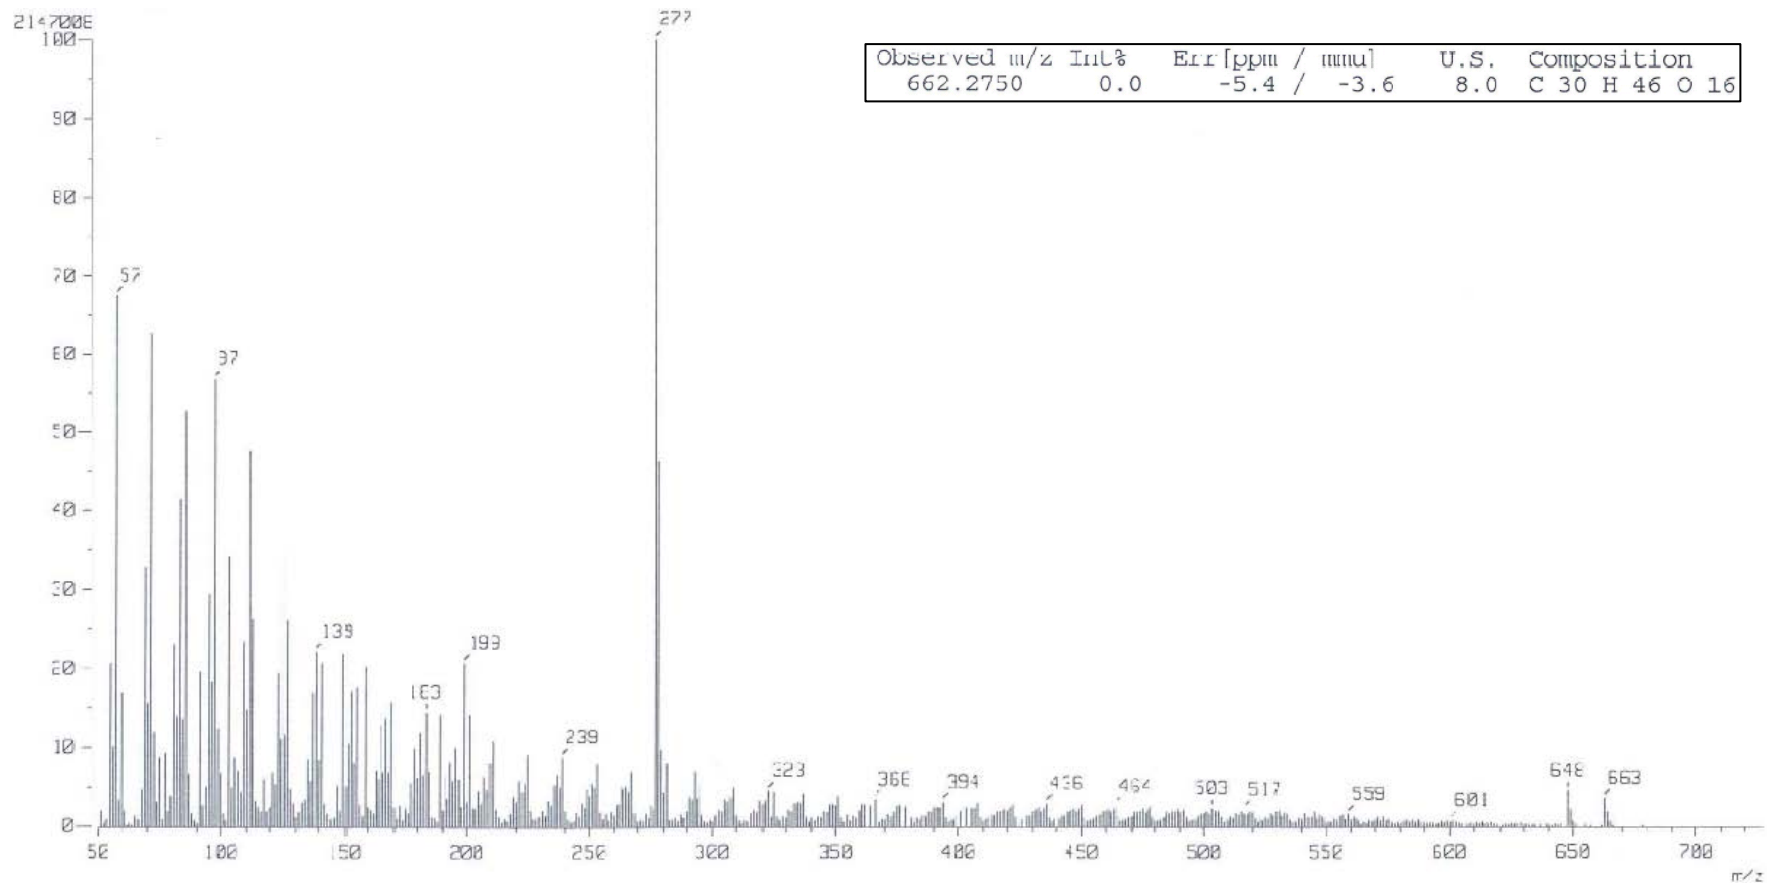

# Supplementary Fig. 7

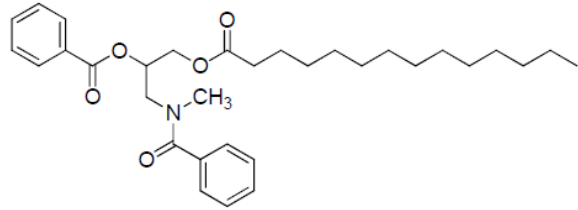

**KTH-15-2 (M.W. = 523)**

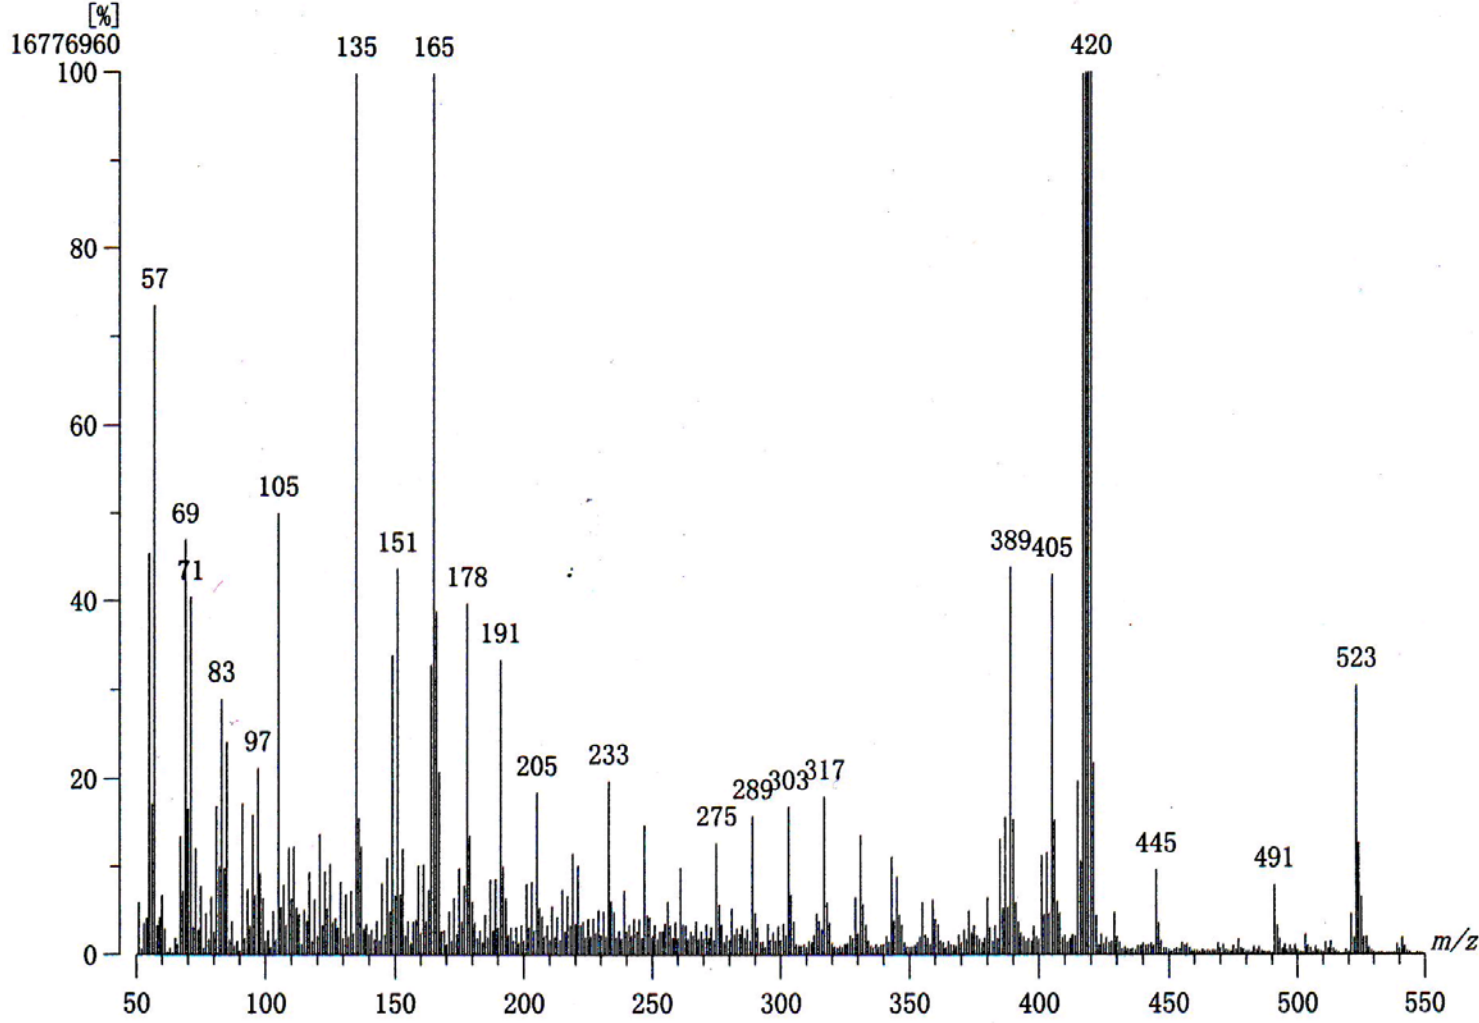



# Supplementary Fig. 8

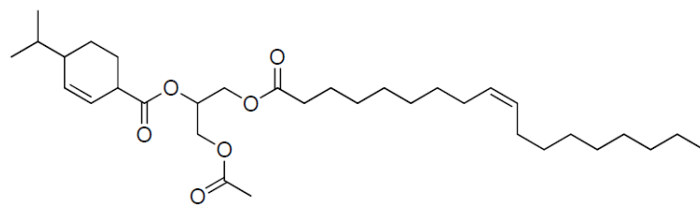

**KTH-17 (M.W. = 506)**

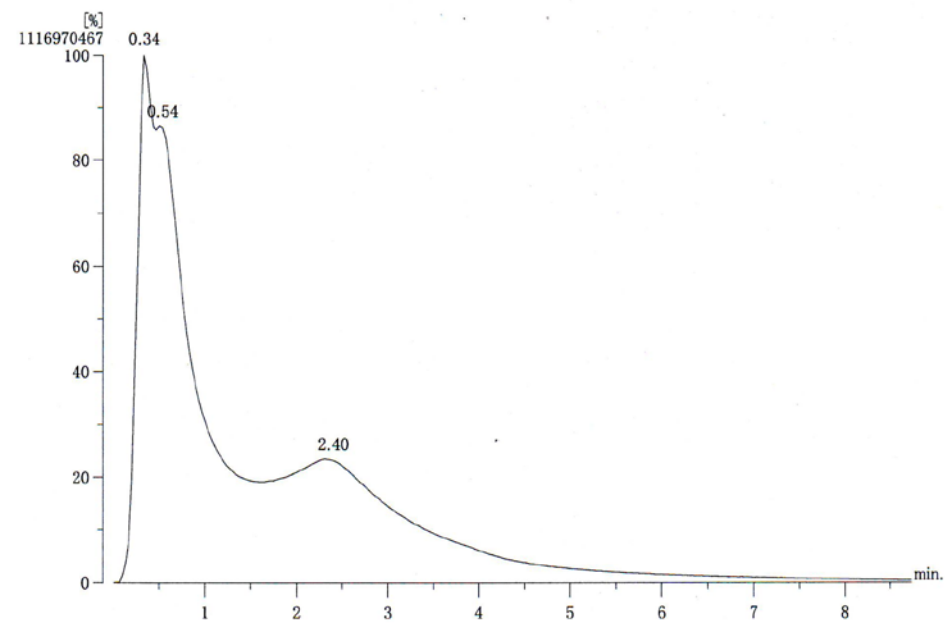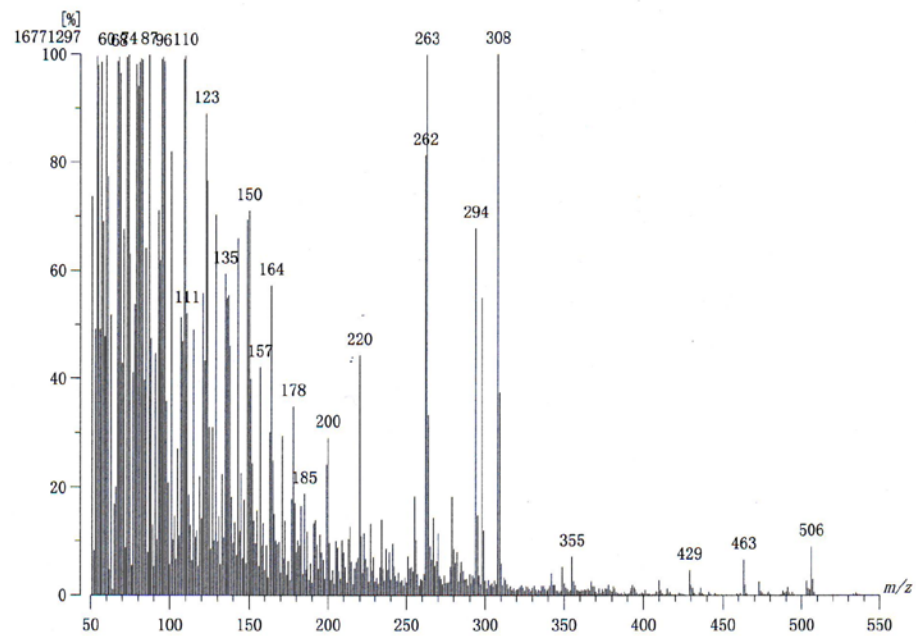

Supplement: 739874.f1.pdf [file 739874.f1.pdf]
